# Supplementary material for: Analysis of Softwood Lignans by Comprehensive Two-Dimensional Liquid Chromatography
Source: MDPI journal article supplement (doi:10.3390/molecules28248114), 2023-12-15
Supplement: s1 [file s1]

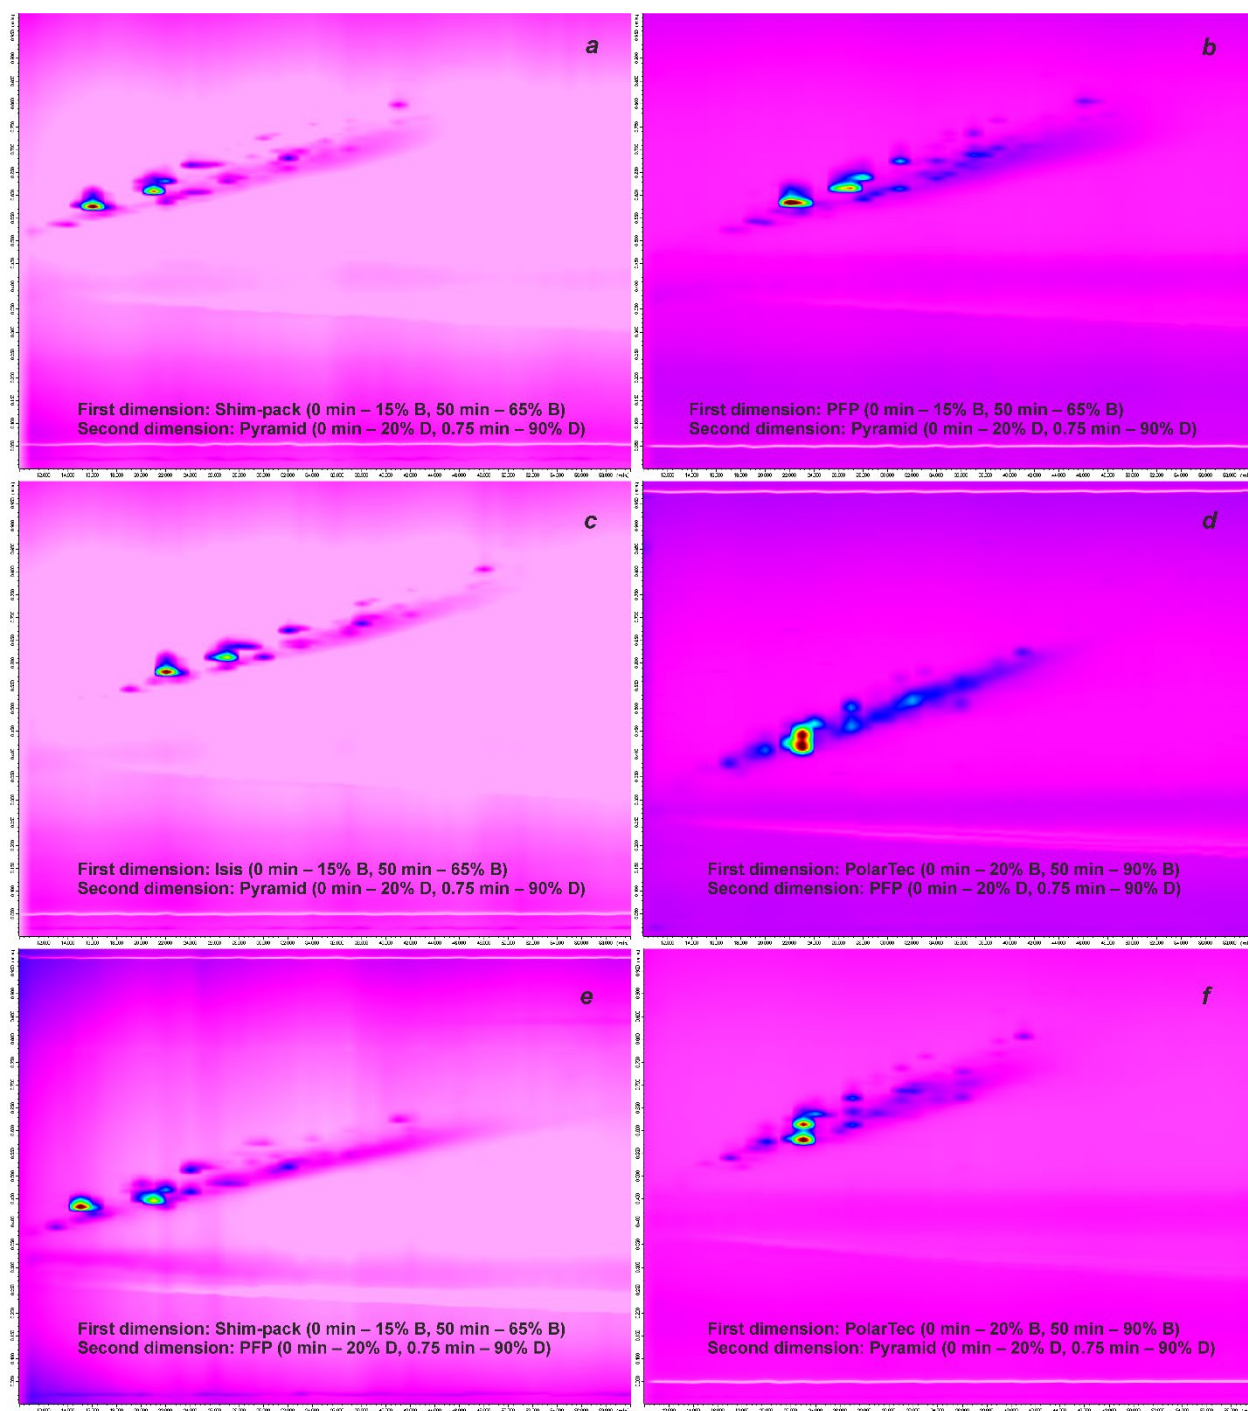

**Figure S1.** LCxLC-UV chromatograms (280 nm) of larch knotwood extract recorded on different <sup>1</sup>D and <sup>2</sup>D column combinations.

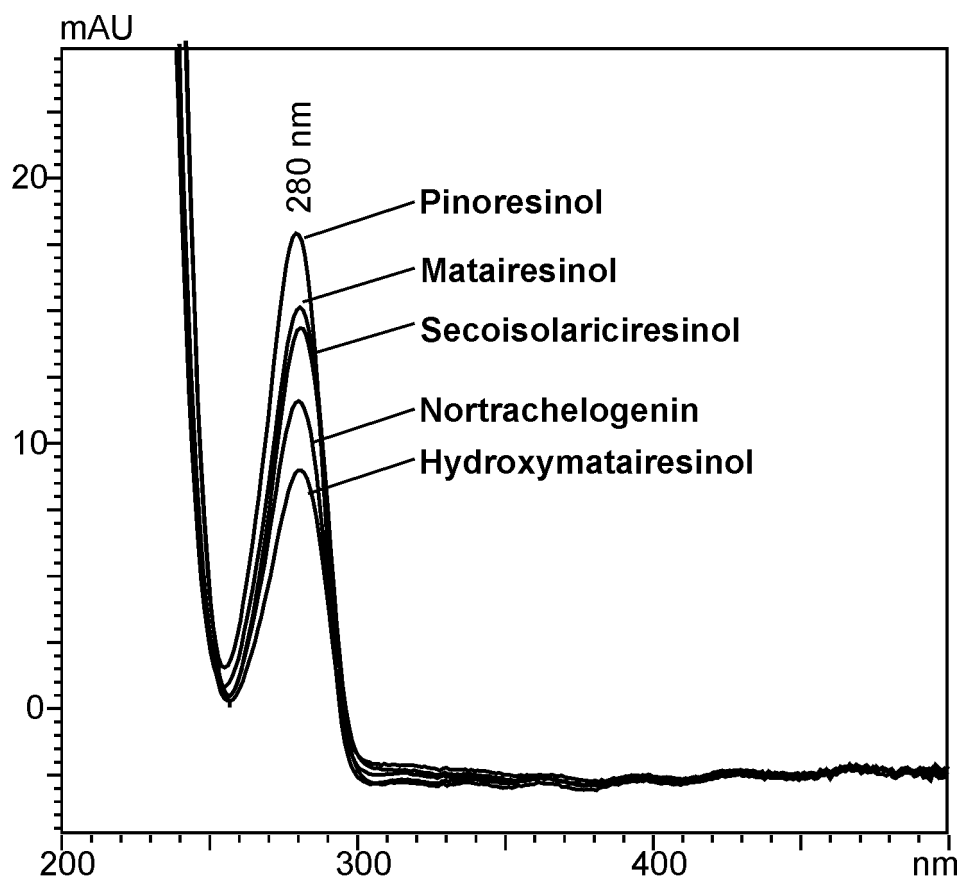

Figure S2. Scaled UV spectra of lignans.

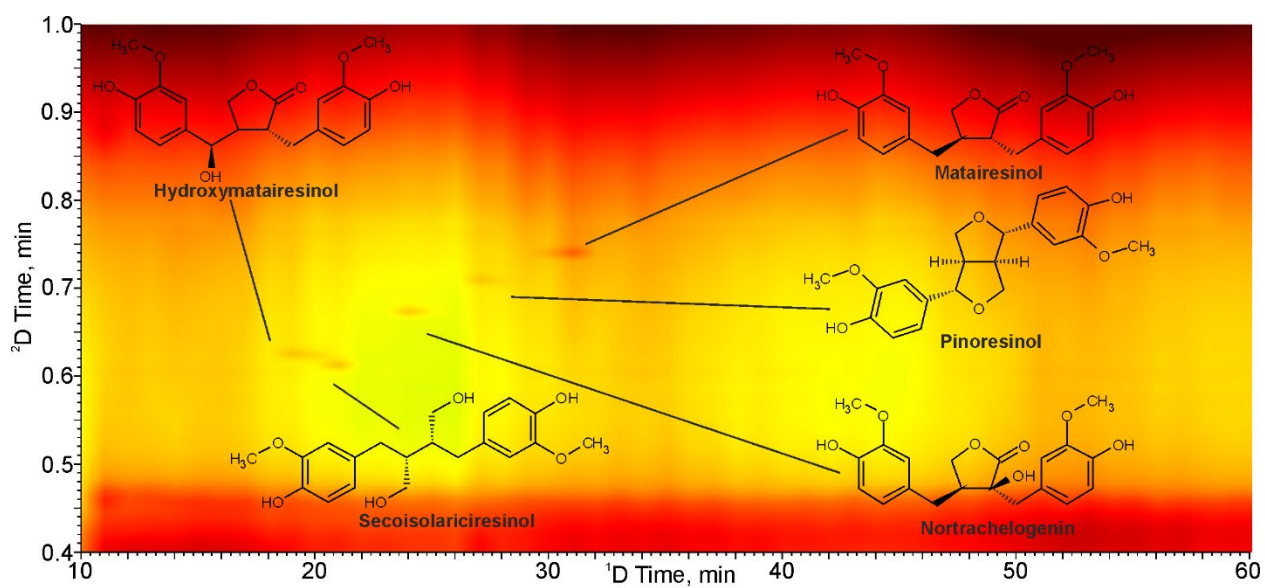

Figure S3. LC×LC-UV chromatogram (280 nm) of analytes model mixture (1.0 mg L<sup>-1</sup>).

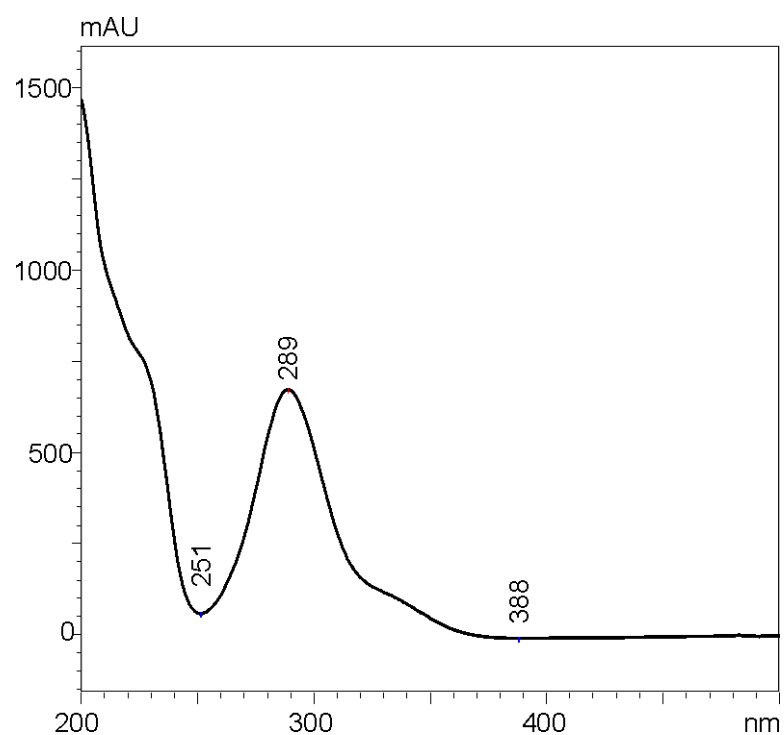

**Figure S4.** UV spectrum of the component of the larch knotwood extract with <sup>1</sup>D Time 16.05 min and <sup>2</sup>D Time 0.58 min.

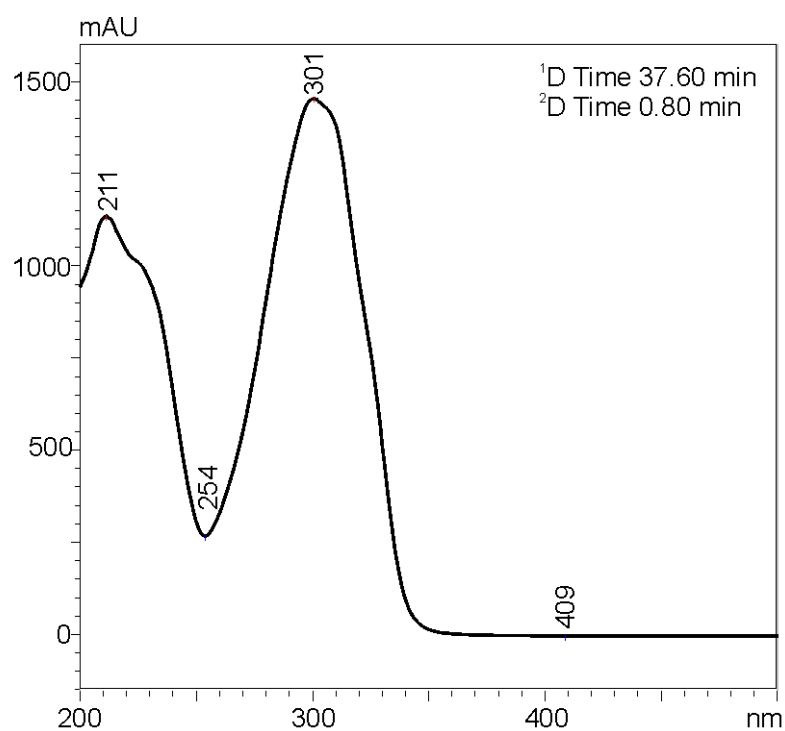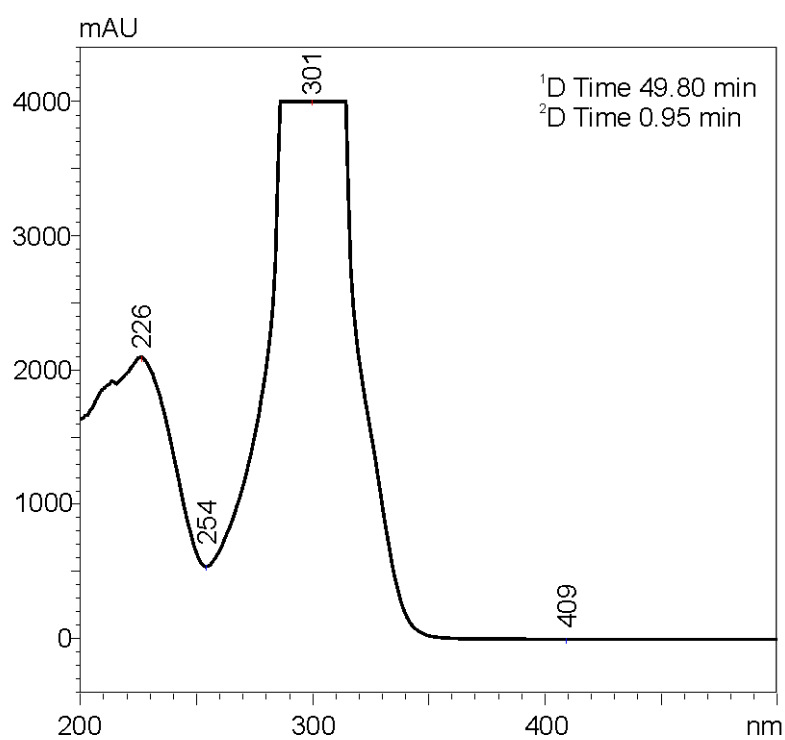

**Figure S5.** UV spectra of the components of pine knotwood extract.

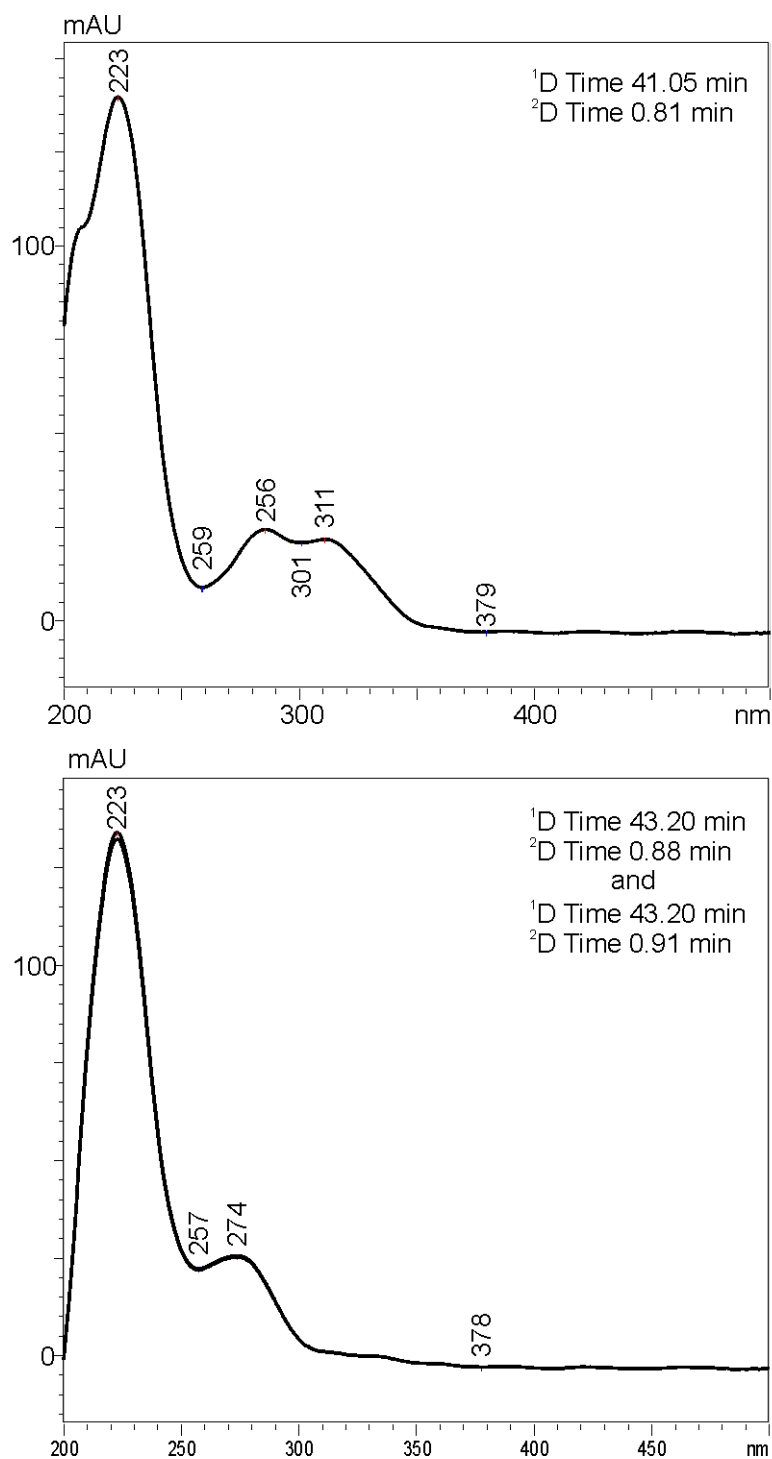

Figure S6. UV spectra of the components of fir knotwood extract

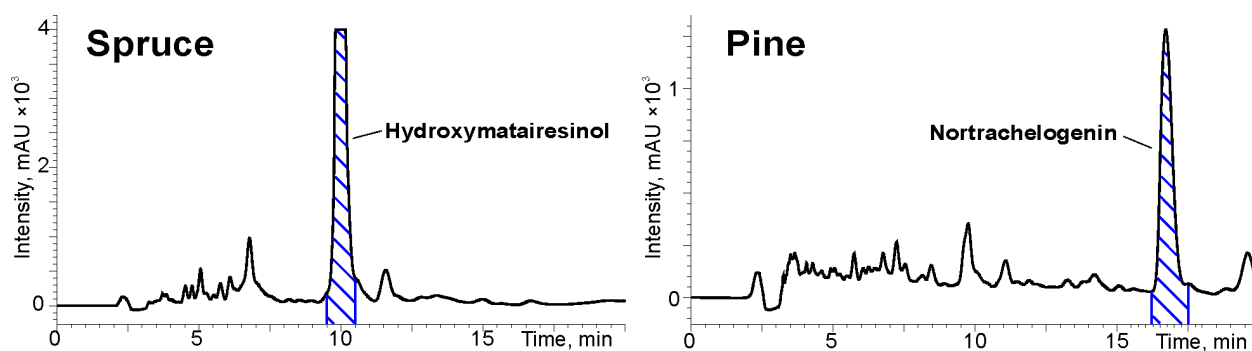

Figure S7. Preparative LC-UV chromatograms (280 nm) of extracts.

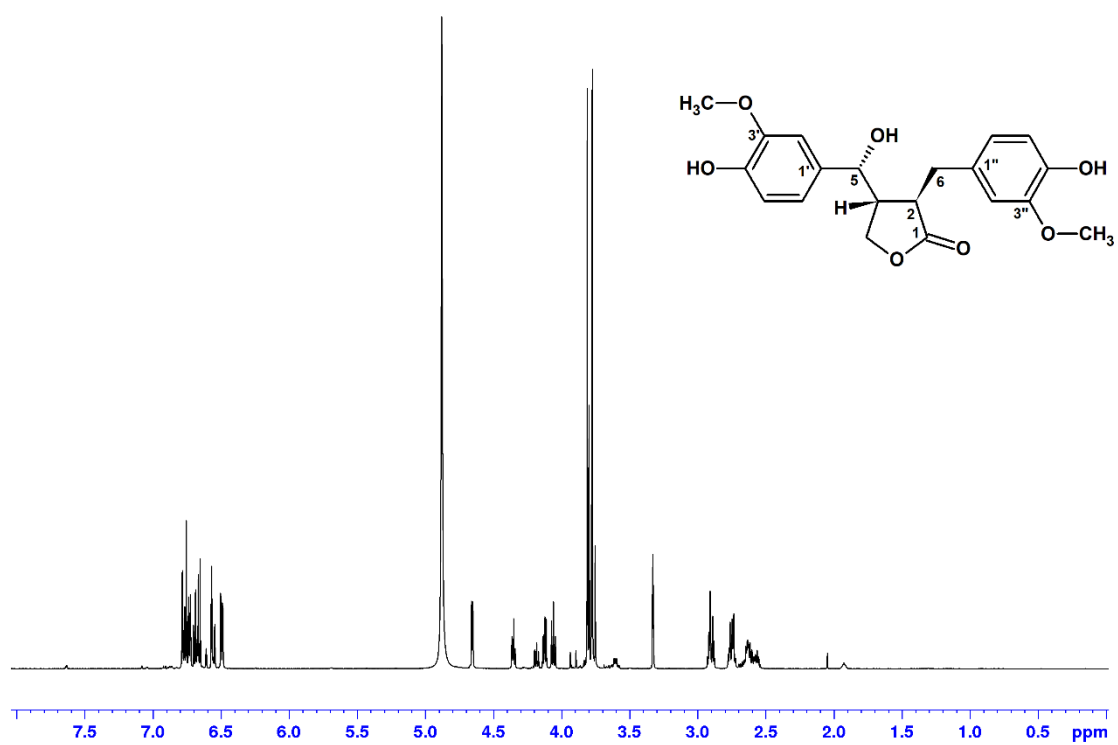

**Figure S8.** <sup>1</sup>H NMR spectrum of hydroxymatairesinol (Methanol-d<sub>4</sub>).

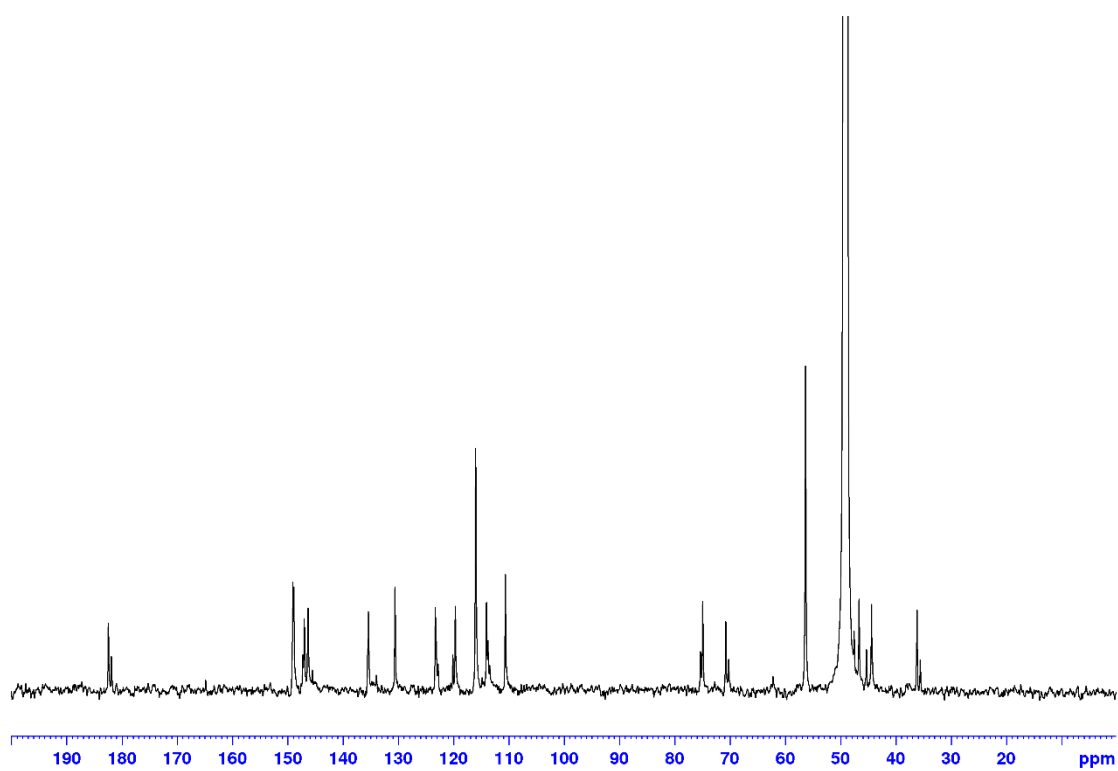

**Figure S9.** <sup>13</sup>C NMR spectrum of hydroxymatairesinol (Methanol-d<sub>4</sub>).

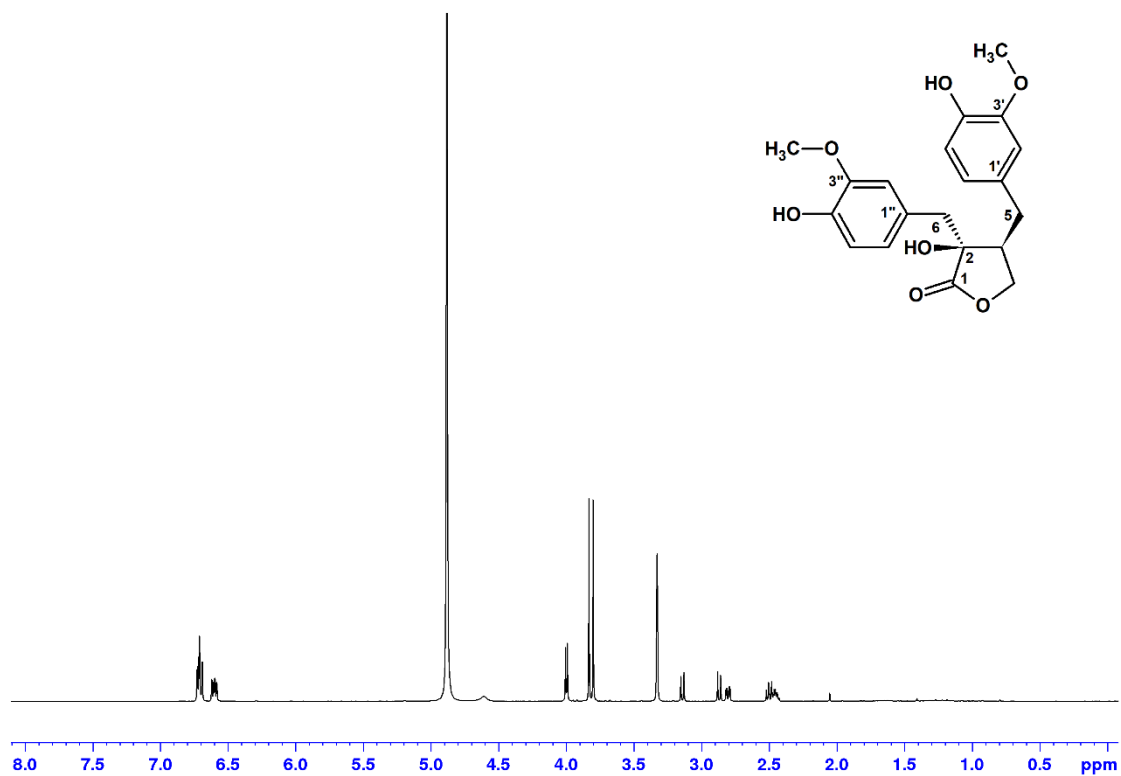

**Figure S10.**  $^1\text{H}$  NMR spectrum of nortrachelogenin ( $\text{Methanol-}d_4$ ).

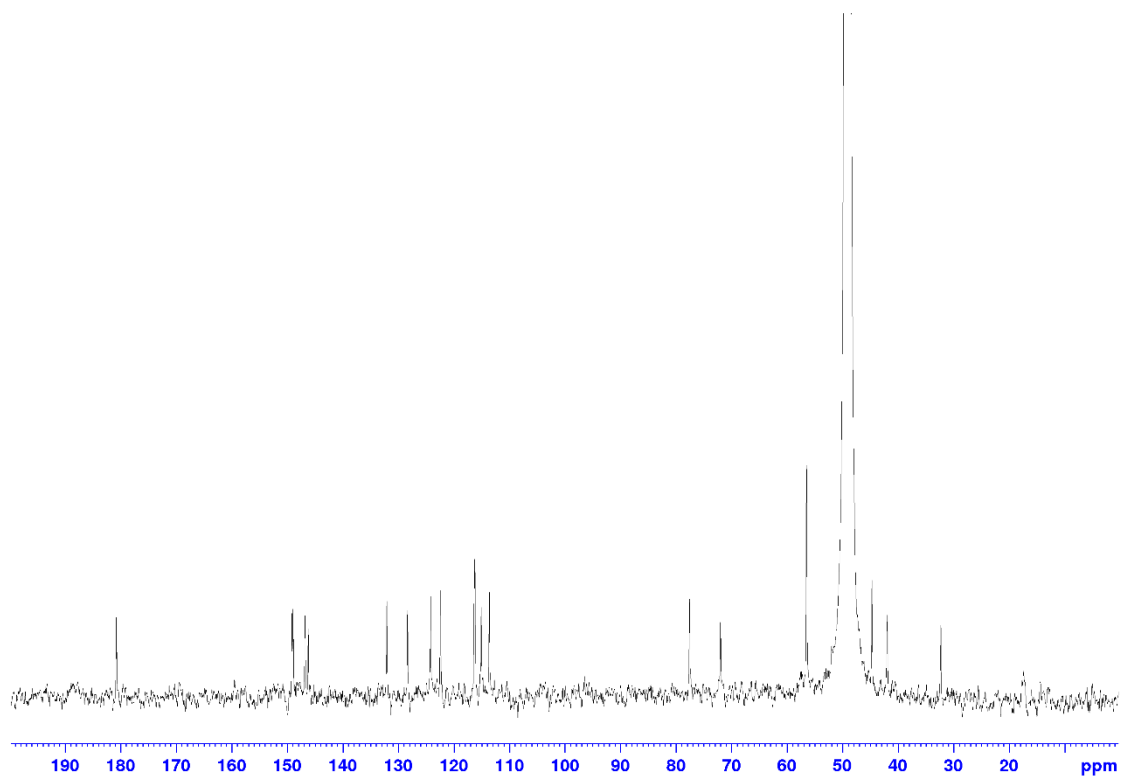

**Figure S11.**  $^{13}\text{C}$  NMR spectrum of nortrachelogenin ( $\text{Methanol-}d_4$ ).

**Table S1.** <sup>1</sup>H NMR (600 MHz) Spectroscopic Data of hydroxymatairesinol (1) and nortrachelogenin (2).

| proton                | 1                             | 1 (isomer)    | 2                      |
|-----------------------|-------------------------------|---------------|------------------------|
| 1                     | -                             | -             | -                      |
| 2                     | 2.89 m                        | 2.72 m        | -                      |
| 3                     | 2.62 m                        | 2.55 m        | 2.44 m                 |
| 4                     | 4.10 t (8.75), 4.04 t (10.09) | 4.24 m        | 3.98 d (8.25)          |
| 5                     | 4.64 d (5.23)                 | 4.34 d (7.06) | 2.65 ddd (13.34; 4.81) |
| 6                     | 2.8                           | 2.8           | 2.99 dd (13.48)        |
| 1'                    | -                             | -             | -                      |
| 2'                    | 6.77 m                        | 6.71 m        | 6.67 m                 |
| 3'                    | -                             | -             | -                      |
| 4'                    | -                             | -             | -                      |
| 5'                    | 6.74 m                        | 6.67 m        | 6.7 m                  |
| 6'                    | 6.71 m                        | 6.67 m        | 6.6 m                  |
| 1''                   | -                             | -             | -                      |
| 2''                   | 6.55 m                        | 6.53 m        | 6.69 m                 |
| 3''                   | -                             | -             | -                      |
| 4''                   | -                             | -             | -                      |
| 5''                   | 6.64 m                        | 6.64 m        | 6.7 m                  |
| 6''                   | 6.47 m                        | 6.47 m        | 6.57 m                 |
| OCH <sub>3</sub> -3'  | 3.79 s                        | 3.79 s        | 3.78 s                 |
| OCH <sub>3</sub> -3'' | 3.75 s                        | 3.75 s        | 3.81 s                 |

**Table S2.** <sup>13</sup>C NMR (150 MHz) Spectroscopic Data of hydroxymatairesinol (1) and nortrachelogenin (2).

| carbon                | 1      | 1 (isomer) | 2      |
|-----------------------|--------|------------|--------|
| 1                     | 182.04 | 181.62     | 180.53 |
| 2                     | 44.06  | 45.05      | 77.34  |
| 3                     | 46.35  | 47.27      | 44.58  |
| 4                     | 70.33  | 69.76      | 71.55  |
| 5                     | 74.61  | 75.05      | 32.05  |
| 6                     | 35.89  | 35.89      | 41.8   |
| 1'                    | 135.13 | 133.64     | 131.87 |
| 2'                    | 110.39 | 110.25     | 113.42 |
| 3'                    | 148.78 | 148.78     | 148.65 |
| 4'                    | 146.68 | 147.15     | 146.08 |
| 5'                    | 115.73 | 115.73     | 115.84 |
| 6'                    | 119.44 | 119.84     | 122.24 |
| 1''                   | 113.19 | 113.19     | 128.15 |
| 2''                   | 113.62 | 113.59     | 114.83 |
| 3''                   | 148.59 | 148.59     | 148.87 |
| 4''                   | 146.02 | 146.02     | 146.59 |
| 5''                   | 115.68 | 115.68     | 115.84 |
| 6''                   | 123.03 | 123.03     | 123.97 |
| OCH <sub>3</sub> -3'  | 55.84  | 55.84      | 56.01  |
| OCH <sub>3</sub> -3'' | 55.84  | 55.84      | 55.93  |
